# Supplementary material
Source: MDPI journal article supplement (https://www.mdpi.com/2076-3417/14/8/3535)
Supplement: s1 [file s1]

Table S1: Results of the Pearson Correlation

| Variable   |            | 5 m       | 10 m     | 20 m      | SJ       | CMJ      | CMJa     | Broad Jump | Hop test |
|------------|------------|-----------|----------|-----------|----------|----------|----------|------------|----------|
| 5 m        | Pearson' r | -         |          |           |          |          |          |            |          |
|            | p-value    | -         |          |           |          |          |          |            |          |
| 10 m       | Pearson' r | 0.530**   | -        |           |          |          |          |            |          |
|            | p-value    | 0.004     | -        |           |          |          |          |            |          |
| 20 m       | Pearson' r | 0.811***  | 0.676*** | -         |          |          |          |            |          |
|            | p-value    | < 0.001   | < 0.001  | -         |          |          |          |            |          |
| SJ         | Pearson' r | -0.613*** | -0.477*  | -0.724*** | -        |          |          |            |          |
|            | p-value    | < 0.001   | 0.012    | < 0.001   | -        |          |          |            |          |
| CMJ        | Pearson' r | -0.453*   | -0.413*  | -0.700*** | 0.645*** | -        |          |            |          |
|            | p-value    | 0.018     | 0.032    | < 0.001   | < 0.001  | -        |          |            |          |
| CMJa       | Pearson' r | -0.425*   | -0.357   | -0.709*** | 0.691*** | 0.719*** | -        |            |          |
|            | p-value    | 0.027     | 0.067    | < 0.001   | < 0.001  | < 0.001  | -        |            |          |
| Broad jump | Pearson' r | -0.041    | -0.269   | -0.428    | 0.379    | 0.729**  | 0.787*** | -          |          |
|            | p-value    | 0.890     | 0.352    | 0.127     | 0.182    | 0.003    | < 0.001  | -          |          |
| Hop test   | Pearson' r | -0.218    | -0.292   | -0.506*   | 0.273    | 0.358    | 0.603**  | 0.778**    | -        |
|            | p-value    | 0.317     | 0.176    | 0.014     | 0.207    | 0.094    | 0.002    | 0.002      | -        |

The 5 m, 10 m and 20 m are sprinting performances with the three different distances; SJ: squat jump; CMJ: counter movement jump; CMJa: counter movement jump with arms. Significant correlations are shown: \* ( $p < 0.05$ ), \*\* ( $p < 0.01$ ) and \*\*\* ( $p < 0.001$ ).
